# Supplementary material for: Application of a MALDI-TOF analysis platform (ClinProTools) for rapid and preliminary report of MRSA sequence types in Taiwan
Source: PeerJ. 2018 Nov 7;6:e5784. doi: 10.7717/peerj.5784 (PMC6228551; doi:10.7717/peerj.5784)
Supplement: Supplemental Information 1 — *Non-zero data is less which is not enough for calculation. All results are expressed as OR (95% confidence interval, p-value). [file peerj-06-5784-s001.xlsx]

## Sheet: S1
Supplemental Table S1:
Odds ratio and 95% confidence interval for association between informative peaks and respective ST types
Results of simultaneous all-pairs comparisons at m/z=2082.13.
	OR
ST239 vs Others	1.000 (0.999 - 1.000, p=0.212)
ST5 vs Others	1.000 (1.000 - 1.001, p=0.307)
ST59 vs Others	1.000 (0.999 - 1.001, p=0.714)
ST5 vs ST239	1.001 (1.000 - 1.002, p=0.006)
ST59 vs ST239	1.001 (1.000 - 1.001, p=0.035)
ST59 vs ST5	1.000 (0.999 - 1.000, p=0.358)
Results of simultaneous all-pairs comparisons at m/z=2415.79.
	OR
ST239 vs Others	1.197 (1.033 - 1.379, p=0.013)
ST5 vs Others	1.073 (0.905 - 1.266, p=0.681)
ST59 vs Others	0.903 (0.787 - 1.042, p=0.233)
ST5 vs ST239	0.895 (0.803 - 1.000, p=0.051)
ST59 vs ST239	0.754 (0.700 - 0.816, p=<0.001)
ST59 vs ST5	0.843 (0.754 - 0.946, p=0.002)
Results of simultaneous all-pairs comparisons at m/z=2430.49.
	OR
ST239 vs Others	1.163 (1.022 - 1.317, p=0.016)
ST5 vs Others	1.108 (0.945 - 1.293, p=0.318)
ST59 vs Others	0.927 (0.818 - 1.052, p=0.378)
ST5 vs ST239	0.953 (0.848 - 1.073, p=0.687)
ST59 vs ST239	0.797 (0.741 - 0.859, p=<0.001)
ST59 vs ST5	0.836 (0.745 - 0.943, p=0.002)
Results of simultaneous all-pairs comparisons at m/z=2880.03.
	OR
ST239 vs Others	1.088 (0.954 - 1.236, p=0.309)
ST5 vs Others	0.868 (0.767 - 0.987, p=0.027)
ST59 vs Others	0.872 (0.770 - 0.991, p=0.033)
ST5 vs ST239	0.798 (0.752 - 0.849, p=<0.001)
ST59 vs ST239	0.802 (0.755 - 0.852, p=<0.001)
ST59 vs ST5	1.005 (0.962 - 1.049, p=0.991)
Results of simultaneous all-pairs comparisons at m/z=2980.45.
	OR
ST239 vs Others	1.089 (0.930 - 1.269, p=0.464)
ST5 vs Others	0.980 (0.820 - 1.172, p=0.989)
ST59 vs Others	0.824 (0.712 - 0.961, p=0.010)
ST5 vs ST239	0.900 (0.805 - 1.010, p=0.084)
ST59 vs ST239	0.757 (0.706 - 0.814, p=<0.001)
ST59 vs ST5	0.840 (0.754 - 0.941, p=0.002)
Results of simultaneous all-pairs comparisons at m/z=3276.8.
	OR
ST239 vs Others	1.036 (0.635 - NA*, p=NA*)
ST5 vs Others	NA* (NA* - NA*, p=NA*)
ST59 vs Others	1.025 (0.806 - NA*, p=NA*)
ST5 vs ST239	0.964 (NA* - 1.569, p=NA*)
ST59 vs ST239	1.003 (1.001 - 1.006, p=0.016)
ST59 vs ST5	1.026 (0.808 - NA*, p=NA*)
Results of simultaneous all-pairs comparisons at m/z=3876.96.
	OR
ST239 vs Others	0.961 (0.820 - 1.127, p=0.900)
ST5 vs Others	0.771 (0.670 - 0.898, p=<0.001)
ST59 vs Others	0.947 (0.800 - 1.126, p=0.828)
ST5 vs ST239	0.803 (0.763 - 0.845, p=<0.001)
ST59 vs ST239	0.987 (0.900 - 1.082, p=0.978)
ST59 vs ST5	1.230 (1.135 - 1.328, p=<0.001)
Results of simultaneous all-pairs comparisons at m/z=3892.91.
	OR
ST239 vs Others	0.923 (0.831 - 1.028, p=0.194)
ST5 vs Others	1.115 (0.958 - 1.290, p=0.216)
ST59 vs Others	0.927 (0.833 - 1.034, p=0.241)
ST5 vs ST239	1.207 (1.089 - 1.334, p=<0.001)
ST59 vs ST239	1.004 (0.977 - 1.030, p=0.978)
ST59 vs ST5	0.831 (0.751 - 0.925, p=<0.001)
Results of simultaneous all-pairs comparisons at m/z=6553.03.
	OR
ST239 vs Others	0.779 (0.673 - 0.913, p=0.001)
ST5 vs Others	0.993 (0.828 - 1.191, p=1.000)
ST59 vs Others	1.196 (1.000 - 1.415, p=0.051)
ST5 vs ST239	1.274 (1.162 - 1.392, p=<0.001)
ST59 vs ST239	1.536 (1.390 - 1.680, p=<0.001)
ST59 vs ST5	1.204 (1.061 - 1.361, p=0.003)
Results of simultaneous all-pairs comparisons at m/z=6593.54.
	OR
ST239 vs Others	1.124 (0.946 - 1.326, p=0.269)
ST5 vs Others	0.810 (0.690 - 0.962, p=0.012)
ST59 vs Others	0.897 (0.756 - 1.071, p=0.352)
ST5 vs ST239	0.720 (0.664 - 0.786, p=<0.001)
ST59 vs ST239	0.799 (0.724 - 0.884, p=<0.001)
ST59 vs ST5	1.107 (0.993 - 1.232, p=0.074)
* Non-zero data is less which is not enough for calculation.
All results are expressed as OR(95% confidence interval, p-value)
